# Supplementary material for: A bioinformatic framework for immune repertoire diversity profiling enables detection of immunological status
Source: PubMed Central journal article supplement (PMC4489130; doi:10.1186/s13073-015-0169-8), 2015-05-28

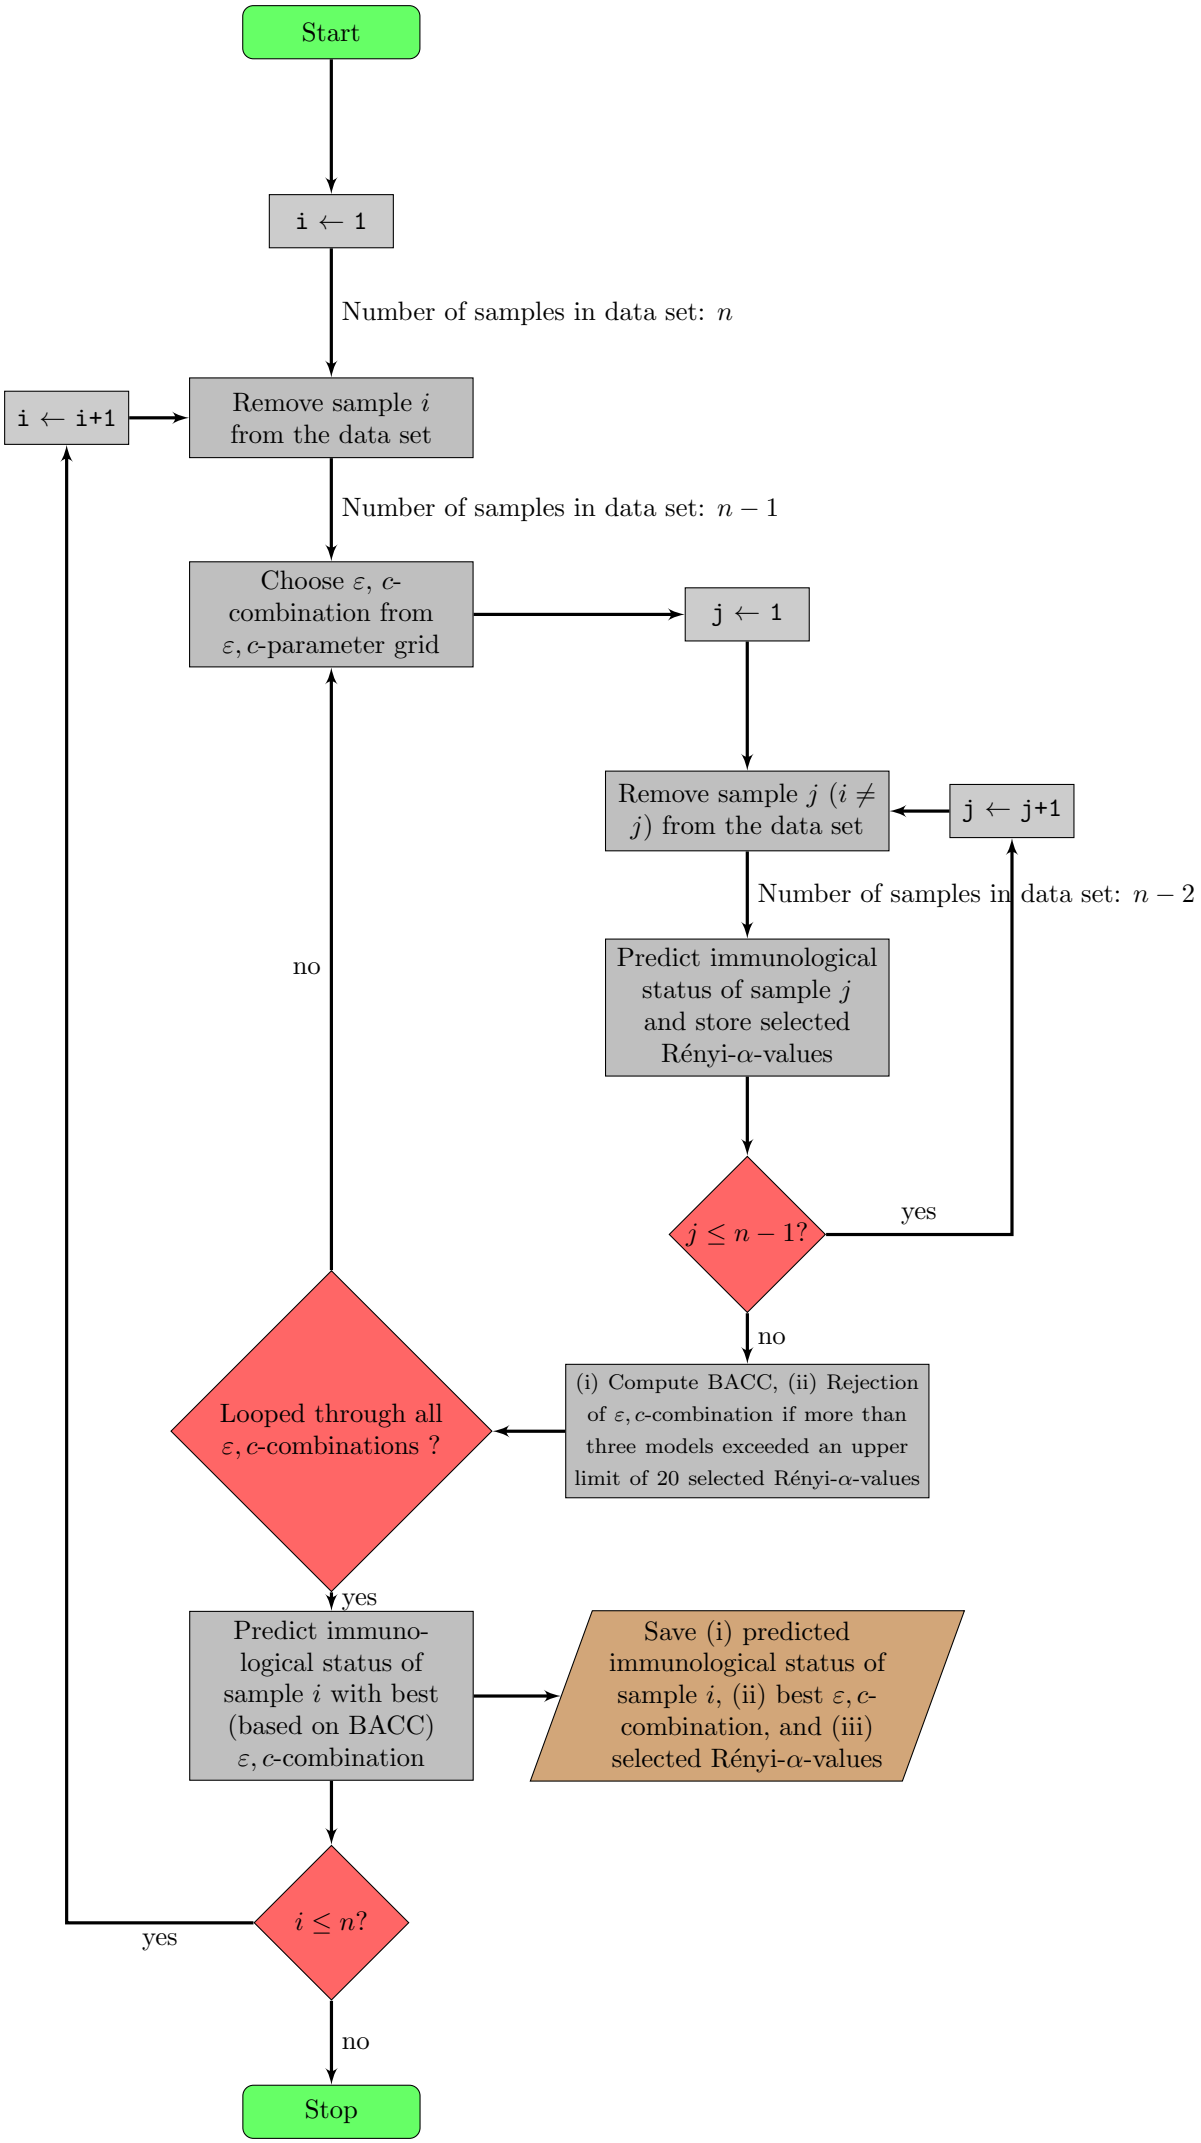

Supplement: 13073_2015_169_MOESM3_ESM.pdf [file 13073_2015_169_MOESM3_ESM.pdf]
