# Supplementary material for: A bioinformatic framework for immune repertoire diversity profiling enables detection of immunological status
Source: PubMed Central journal article supplement (PMC4489130; doi:10.1186/s13073-015-0169-8), 2015-05-28
Supplement: 13073_2015_169_MOESM5_ESM.pdf [file 13073_2015_169_MOESM5_ESM.pdf]

## Additional file 12

*Diversity* ( ${}^\alpha D$ ) is divisible into *Species Richness* ( $SR = {}^{\alpha=0}D$ ) and *Evenness* ( ${}^\alpha E$ ).

*Proof.* Let  $f = \{f_i\}_{i=1,\dots,n}$  be the clonal frequency distribution of a given immune repertoire;  $f_i$  is the clonal frequency of each clone and the species richness (number of unique clones) of the immune repertoire is  $n$ . Let  $f_u$  be the uniform distribution of species richness  $n$ , wherein each clone is equally common ( $f_{u,i} = \frac{1}{n}$  for all  $i$  in  $1, \dots, n$ ). Taking advantage of the fact that the Rényi entropy ( ${}^\alpha \text{RE}$ ) decomposes into the logarithm of the Species Richness (SR) and into the Rényi divergence ( ${}^\alpha D(f||f_u)$ ), one gets:

$${}^\alpha \text{RE} = \frac{1}{1-\alpha} \log \left( \sum_{i=1}^n p_i^\alpha \right) \quad (1)$$

$${}^\alpha \text{RE} = \log(\text{SR}) + {}^\alpha D(f||f_u) \quad (2)$$

$${}^\alpha \text{RE} = \log n - \frac{1}{\alpha-1} \log \left[ \left( \frac{1}{n} \right)^{1-\alpha} \left( \sum_{i=1}^n f_i^\alpha \right) \right] \quad (3)$$

$${}^\alpha \text{RE} = \log n - \left[ \log n + \log \left( \sum_{i=1}^n f_i^\alpha \right)^{\frac{1}{\alpha-1}} \right] \quad (4)$$

$$\exp({}^\alpha \text{RE}) = \exp \left[ \log \left( n \times \frac{(\sum_{i=1}^n f_i^\alpha)^{\frac{1}{1-\alpha}}}{n} \right) \right] \quad (5)$$

$${}^\alpha D = \text{SR} \times \frac{{}^\alpha D}{\text{SR}} \quad (6)$$

$${}^\alpha D = \text{SR} \times {}^\alpha E \quad (7)$$

□
