# Supplementary material for: A bioinformatic framework for immune repertoire diversity profiling enables detection of immunological status
Source: PubMed Central journal article supplement (PMC4489130; doi:10.1186/s13073-015-0169-8), 2015-05-28
Supplement: 13073_2015_169_MOESM8_ESM.pdf [file 13073_2015_169_MOESM8_ESM.pdf]

**A**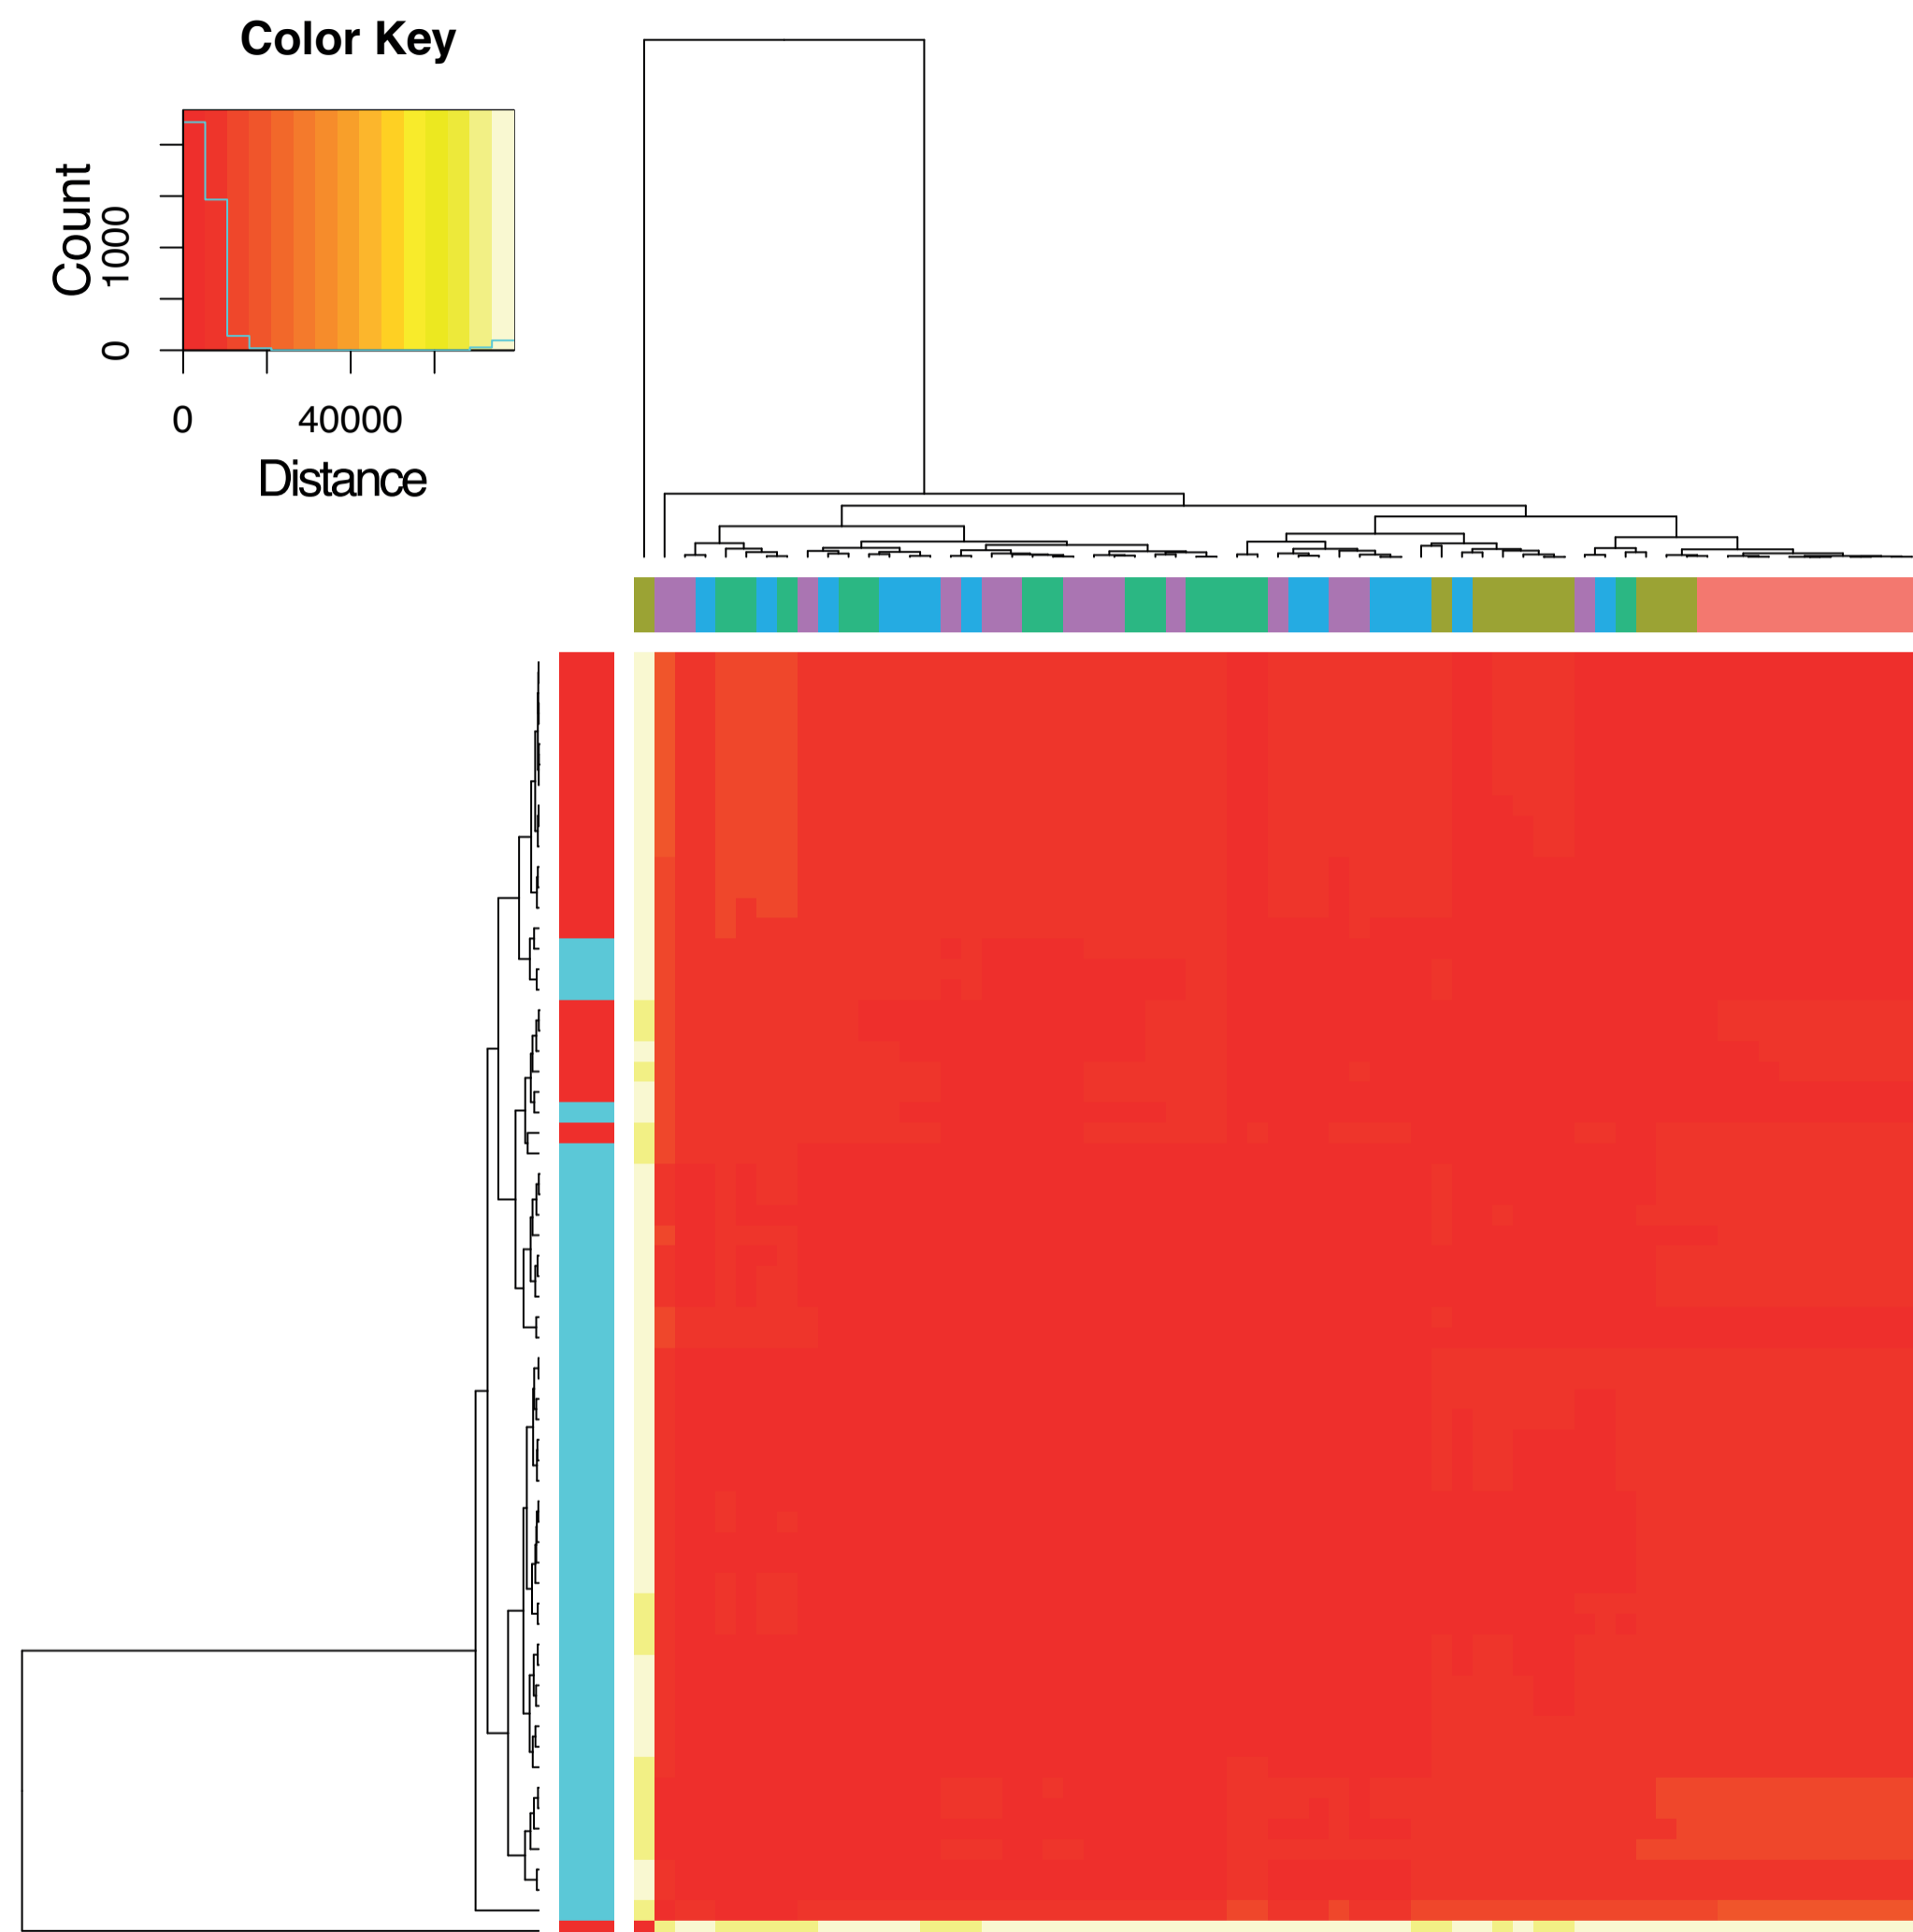**B**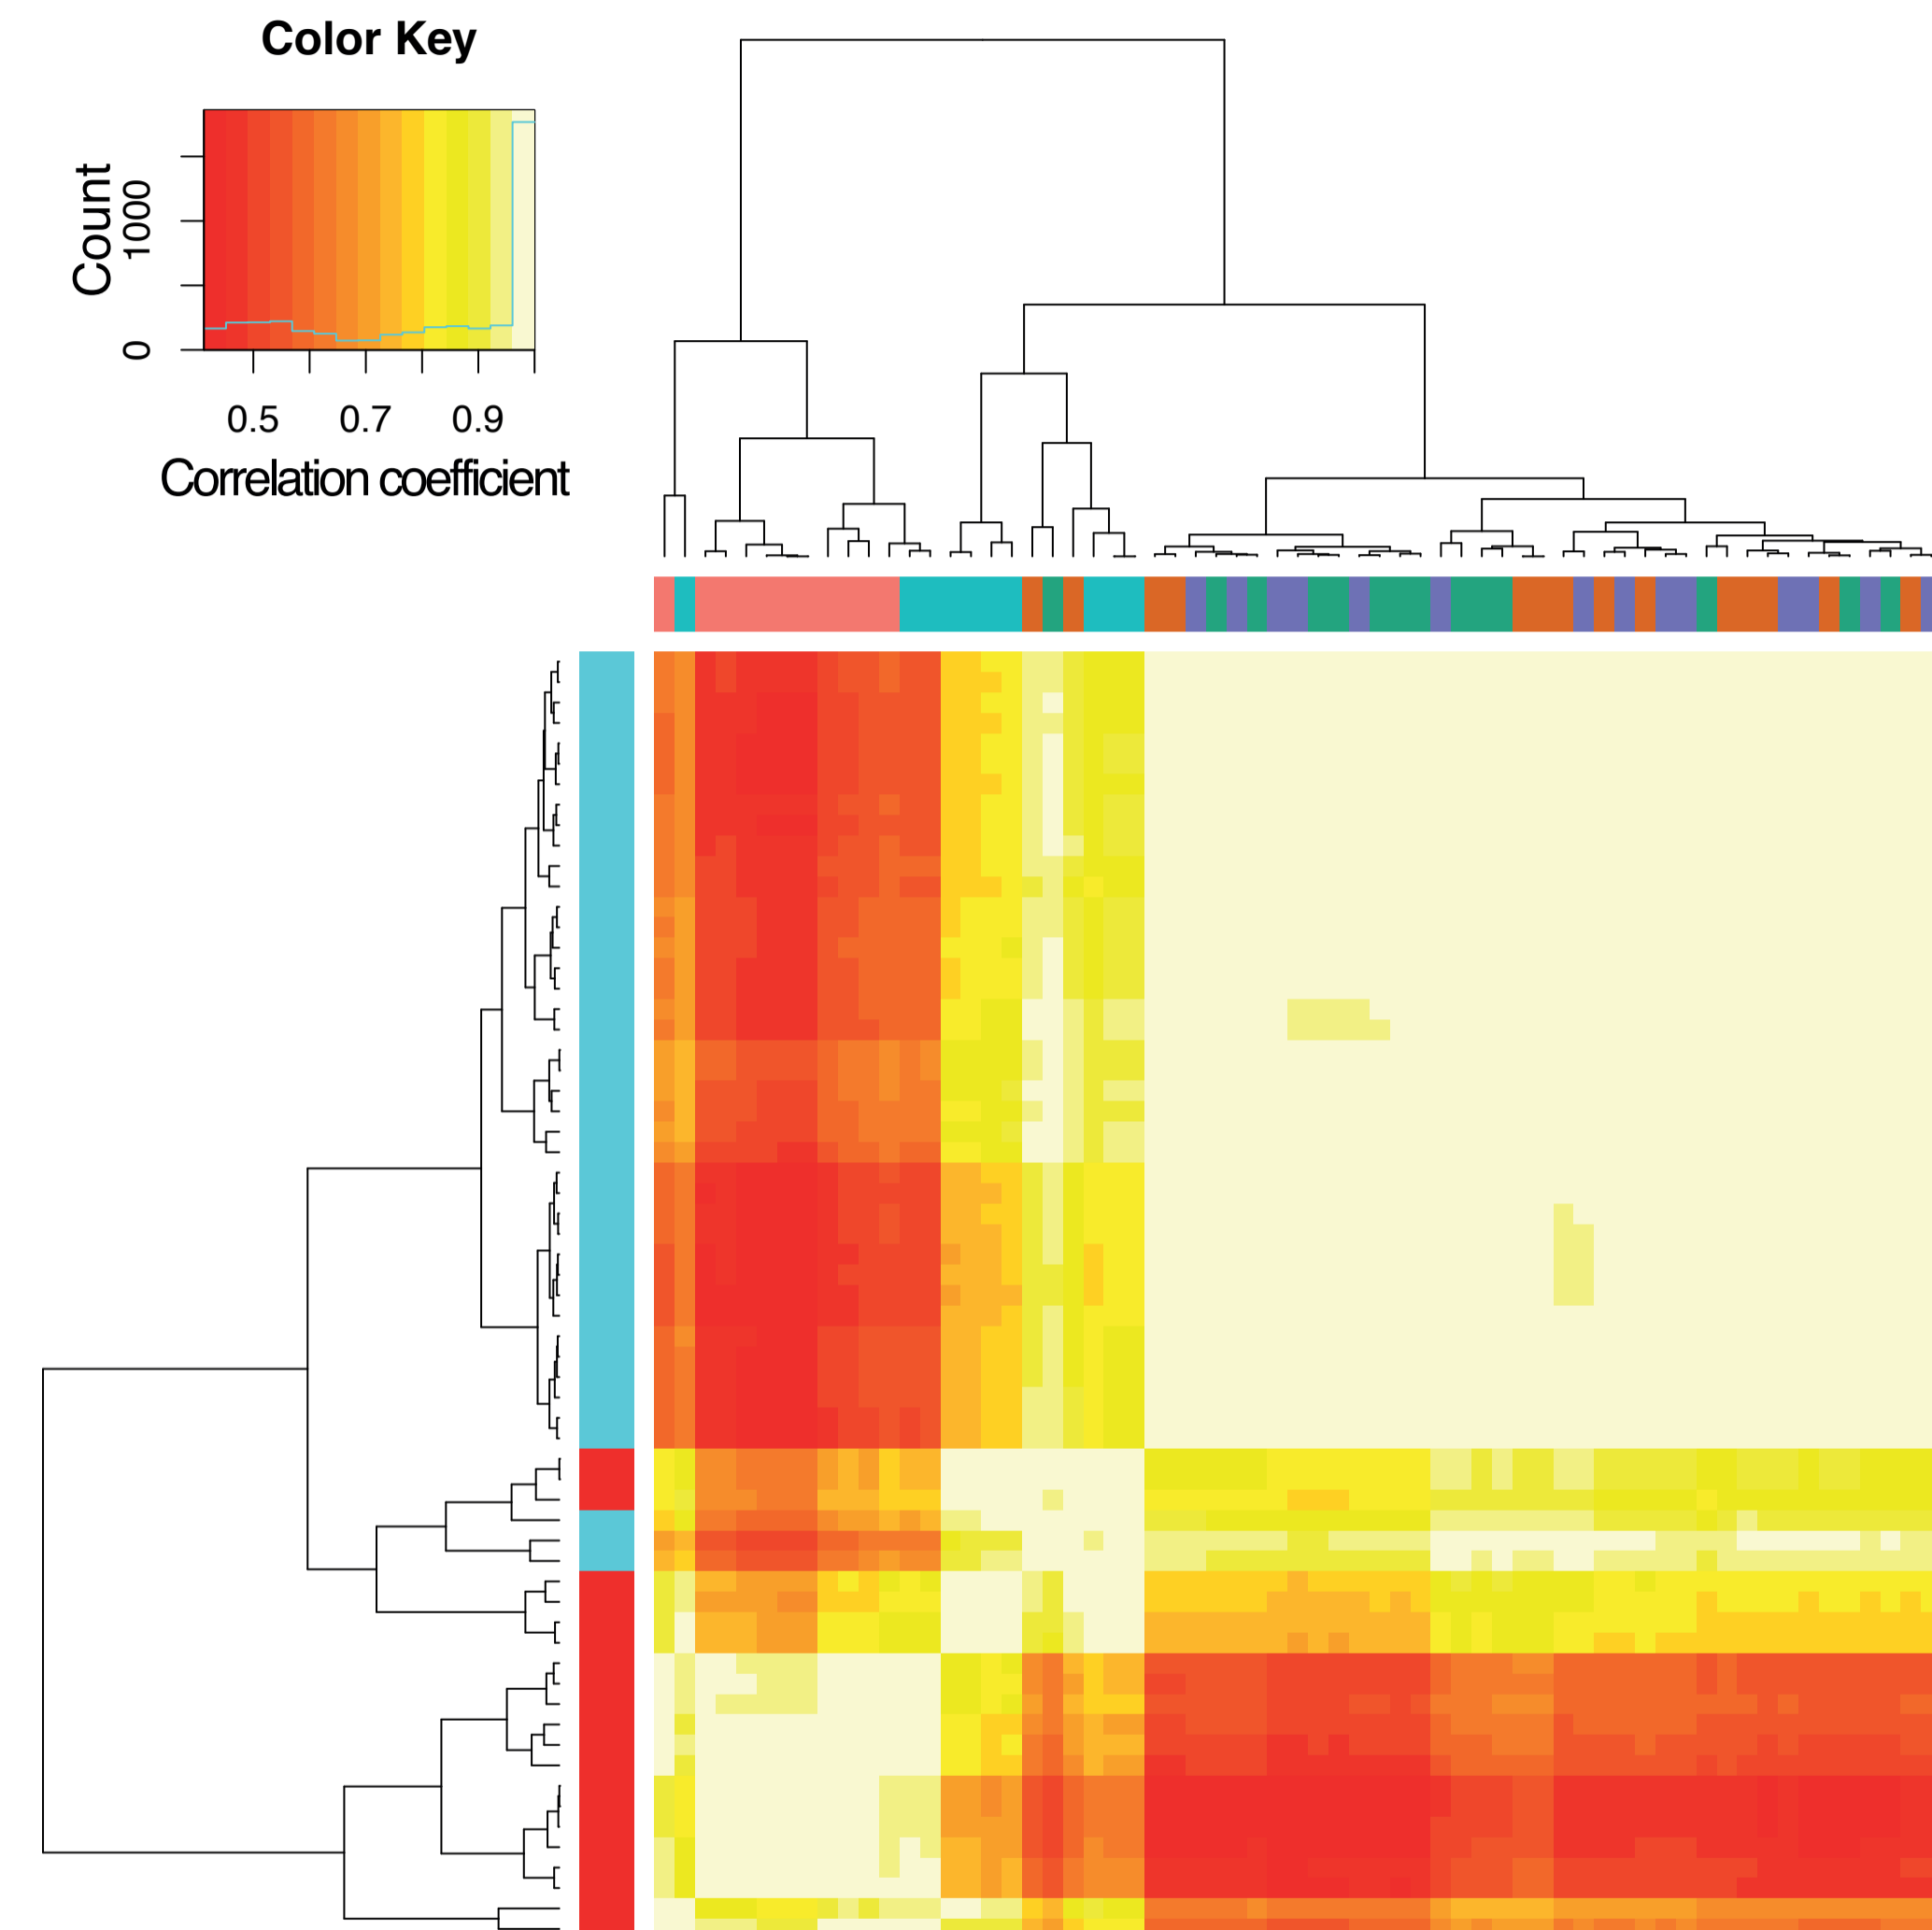

Column colors: ■ Healthy ■ CLL ■ Day 0 ■ Day 7 ■ Day 21

Row colors: ■ Dataset 2 (Healthy and Chronic lymphocytic leukemia samples)

■ Dataset 3 (Influenza vaccination samples)
